# Supplementary material for: Aggregated data from the same laboratories participating in two glucose external quality assessment schemes show that commutability and transfers of values to control materials are decisive for the biases found
Source: publisher site journal article supplement (doi:10.1515/cclm-2023-0532), 2023-07-20
Supplement: Supplementary file 1 [file j_cclm-2023-0532_suppl_001.pdf]

**Supplemental Figures to:**

Gidske G, Sandberg S, Fauskanger P, Pelanti J, Tollånes M, Solsvik AE, Sølvi UO, Vie W, Stavelin A. Aggregated data from the same laboratories participating in two glucose external quality assessment schemes show that commutability and transfers of values to control materials are decisive for the biases found. Published in Clin Chem Lab Med (2024).

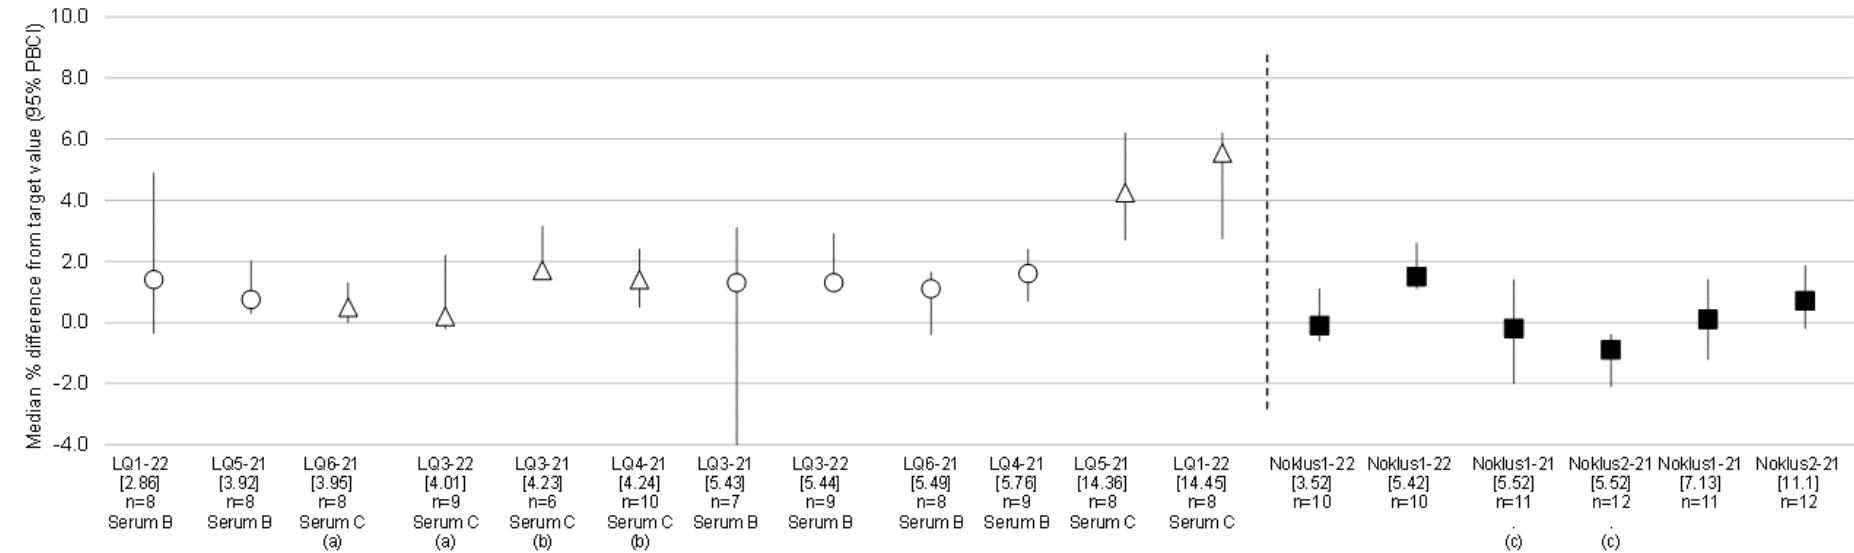

**Supplemental Figure 1:** EQA data from EQA materials serum B (minimally processed) and serum C (processed) measured in six Labquality (LQ) surveys (white), and EQA materials produced by Noklus measured in three Noklus surveys (black) for Abbott Alinity. Median percent deviation from target value (% bias) with 95% percentile bootstrap confidence interval (PBCI) for four MPs. Glucose concentration in mmol/L in []. n, number of results; (a), (b) and (c), EQA materials distributed twice.

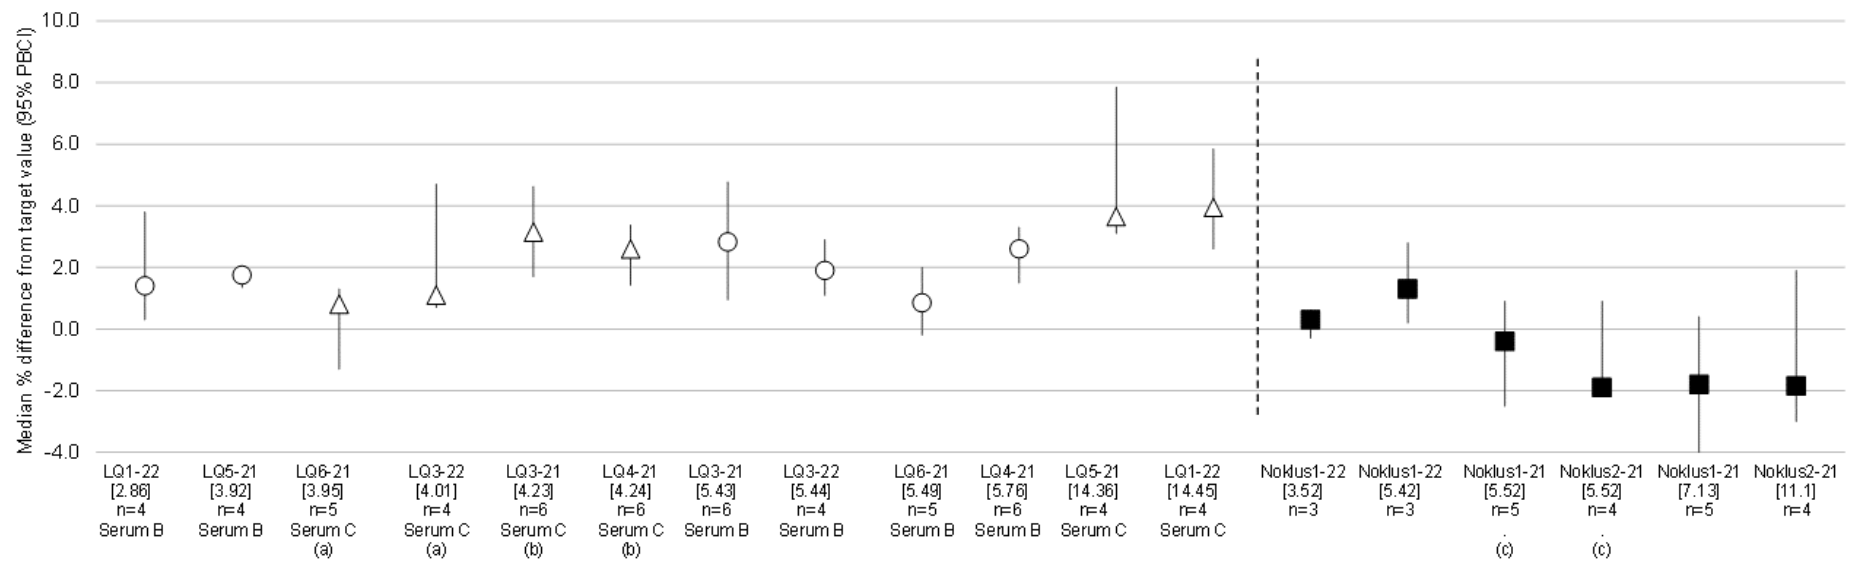

**Supplemental Figure 2:** EQA data from EQA materials serum B (minimally processed) and serum C (processed) measured in six Labquality (LQ) surveys (white), and EQA materials produced by Noklus measured in three Noklus surveys (black) for Abbott Architect. Median percent deviation from target value (% bias) with 95% percentile bootstrap confidence interval (PBCI) for four MPs. Glucose concentration in mmol/L in []. n, number of results; (a), (b) and (c), EQA materials distributed twice.

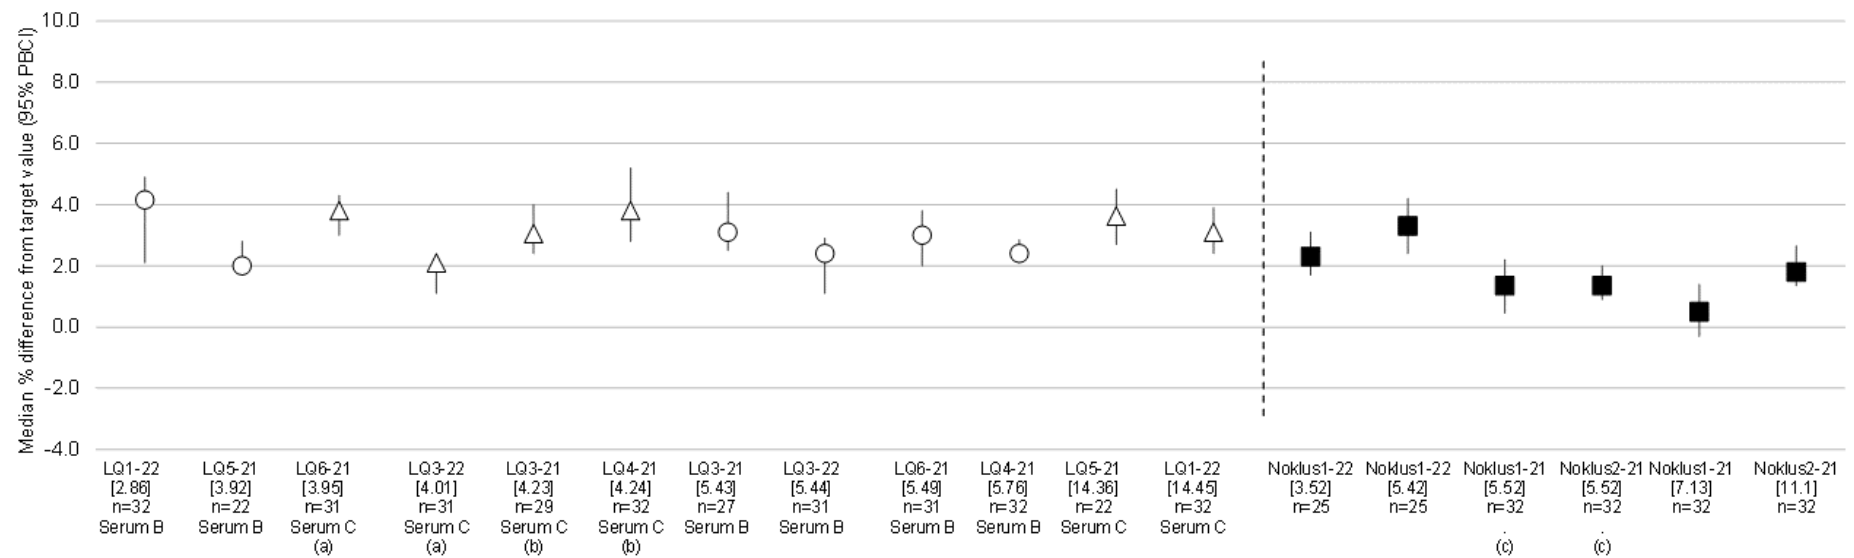

**Supplemental Figure 3:** EQA data from EQA materials serum B (minimally processed) and serum C (processed) measured in six Labquality (LQ) surveys (white), and EQA materials produced by Noklus measured in three Noklus surveys (black) for Roche Cobas. Median percent deviation from target value (% bias) with 95% percentile bootstrap confidence interval (PBCI) for four MPs. Glucose concentration in mmol/L in []. n, number of results; (a), (b) and (c), EQA materials distributed twice.

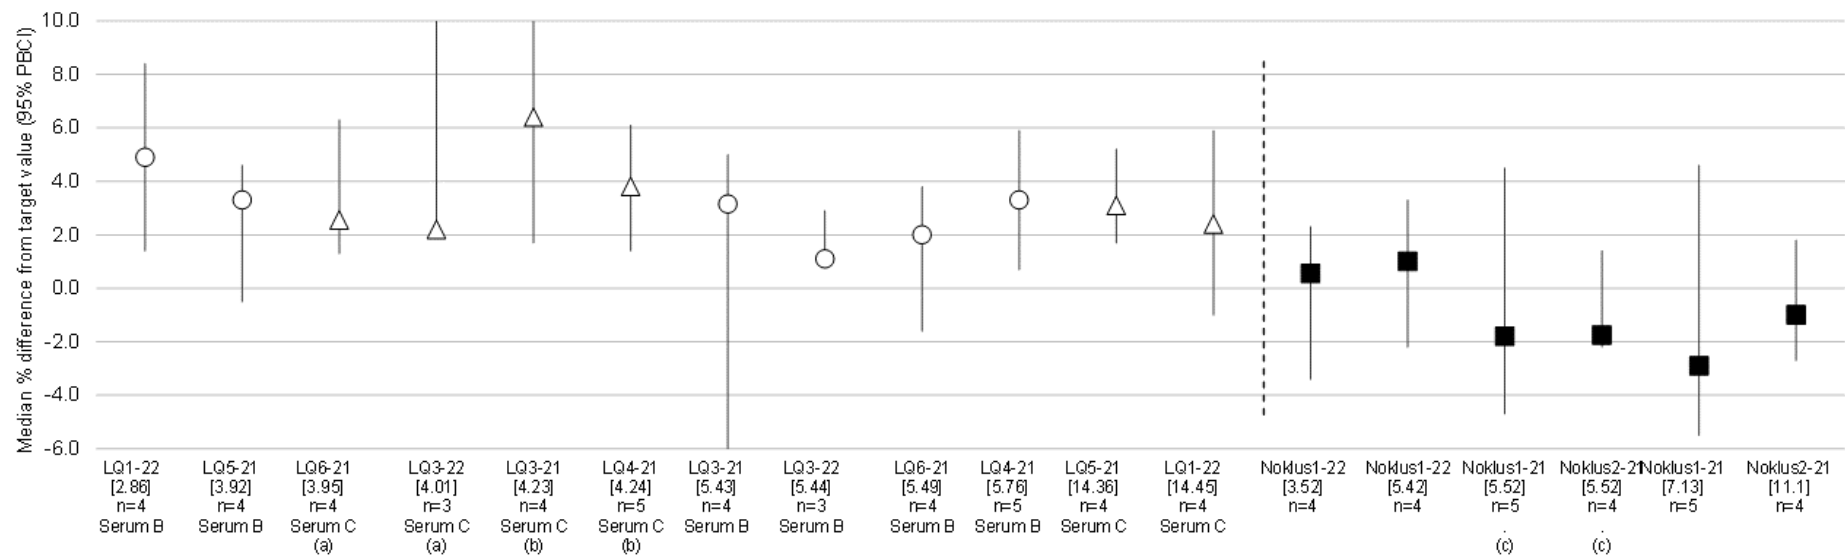

**Supplemental Figure 4:** EQA data from EQA materials serum B (minimally processed) and serum C (processed) measured in six Labquality (LQ) surveys (white), and EQA materials produced by Noklus measured in three Noklus surveys (black) for Siemens Advia. Median percent deviation from target value (% bias) with 95% percentile bootstrap confidence interval (PBCI) for four MPs. Glucose concentration in mmol/L in []. n, number of results; (a), (b) and (c), EQA materials distributed twice.

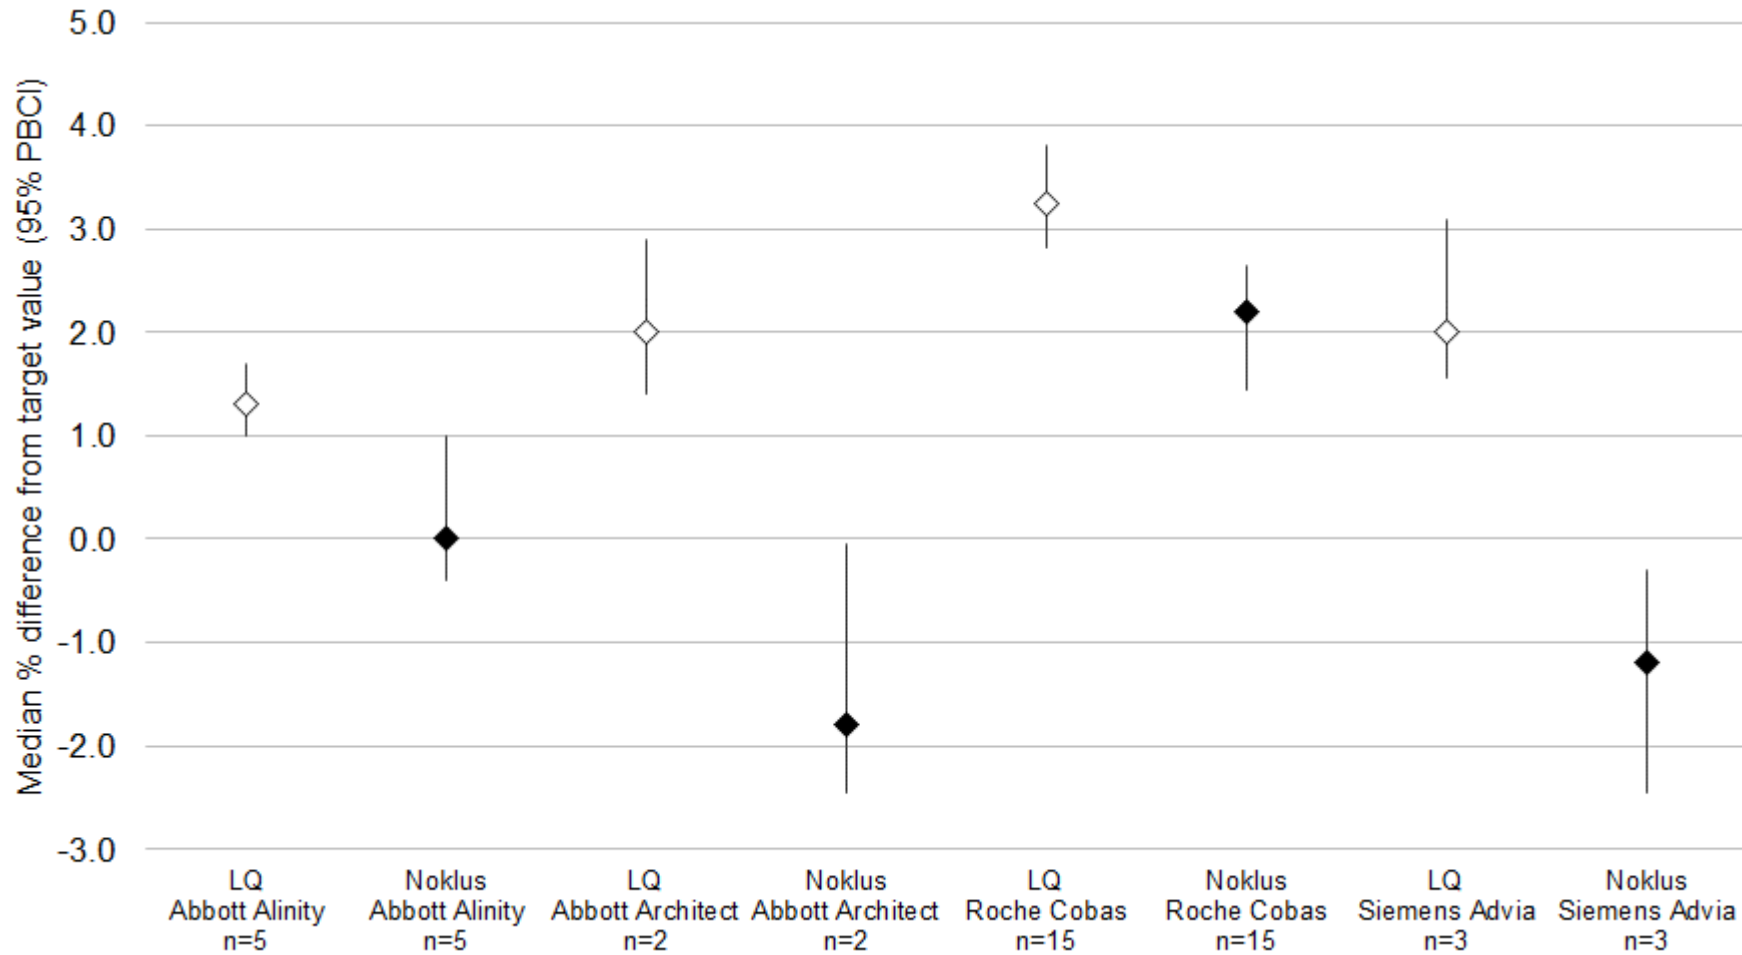

**Supplemental Figure 5:** Aggregated EQA data from six Labquality (LQ) surveys (white) and three Noklus surveys (black). Data from 25 laboratories that responded to all Labquality (LQ)- and Noklus surveys. Median percent difference from target value (% bias) with 95% percentile bootstrap confidence interval (PBCI) for four MPs. n, number of laboratories with each MP.
